# Supplementary material for: Management of abnormal bleeding in etonogestrel-releasing implant users: quo vadis? An exploratory study on the attitudes of a cohort of Italian gynaecologists and review of the literature
Source: Springer Nature journal article supplement (doi:10.1186/s40834-025-00399-8), 2025-09-30
Supplement: MOESM1 [file 40834_2025_399_MOESM1_ESM.docx]

Supplementary A – Survey on the attitudes towards the management of unfavourable bleeding during ENG-releasing implant use

1. **How old are you?**
2. **How many ENG-releasing implants do you insert in a month?**
3. More than 3
4. Between 1 and 3
5. Less than 1
6. None
7. **What type of facility do you work in?**
8. Public
9. Private with public funding/contracted
10. Private
11. **What do you propose as the first choice for a patient who comes back three months after implant insertion due to irregular bleeding?**
12. Removal
13. NSAIDs
14. COC (combined oral contraceptive)
15. Tamoxifen
16. Estradiol
17. Other…
18. **What do you propose as the second choice for a patient who comes back three months after implaint insertion due to irregular bleeding?**
19. Removal
20. NSAIDs
21. COC
22. Tamoxifen
23. Estradiol
24. Other…
25. **What do you propose as the first choice for a patient who comes back three months after implant insertion due to irregular bleeding and has a contraindication to taking COC?**
26. Removal
27. NSAIDs
28. Tamoxifen
29. Transdermal estradiol
30. Other…
31. **What do you propose as the second choice for a patient who comes back three months after implant insertion due to irregular bleeding and has a contraindication to taking COC?**
32. Removal
33. NSAIDs
34. Tamoxifen
35. Transdermal estradiol
36. Other…
